# Supplementary material
Source: Springer Nature journal article supplement (https://www.springermedizin.de/resource/supplementary/12889_2013_5856_MOESM1_ESM.pdf/9496230)

### a) 1970–1985

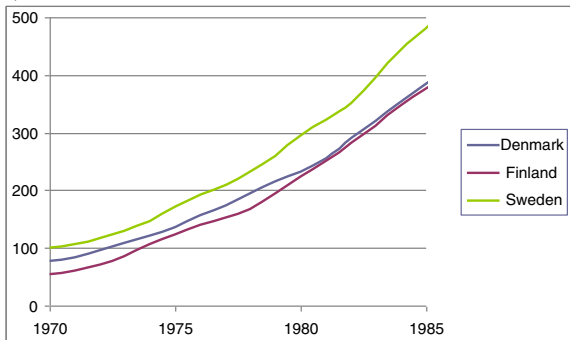

### b) 1986–2006

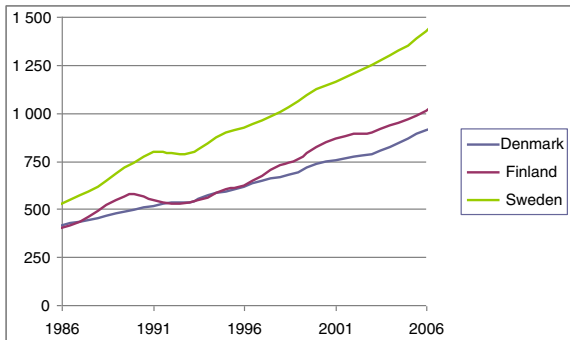

Supplement: MOESM1 [file 9496230]
